# Supplementary material for: Medical Use and Misuse of Prescription Opioids in US 12th-Grade Youth: School-Level Correlates
Source: Oxford University Press journal article supplement (doi:10.1542/peds.2020-0387), 2020-09-10
Supplement: peds_20200387supplementarydata.pdf [file peds_20200387supplementarydata.pdf]

## Supplemental Information

**SUPPLEMENTAL TABLE 6** POM by Individual- and School-Level Characteristics (2002–2017)

|                                                                   | Past-Year POM,<br>Individual-Level Only ( <i>n</i> =<br>28 340), Model 1, <sup>a</sup> aOR (95%<br>CI) | Past-Year POM,<br>School-Level Only ( <i>n</i> =<br>34 481), Model 2, <sup>b</sup> aOR<br>(95% CI) | Past-Year POM, Full<br>Model 3, <sup>c</sup> aOR (95%<br>CI) |
|-------------------------------------------------------------------|--------------------------------------------------------------------------------------------------------|----------------------------------------------------------------------------------------------------|--------------------------------------------------------------|
| Individual level                                                  |                                                                                                        |                                                                                                    |                                                              |
| Medical opioid use,<br>lifetime: only<br>medical                  |                                                                                                        |                                                                                                    |                                                              |
| No                                                                | Reference                                                                                              | —                                                                                                  | Reference                                                    |
| Yes                                                               | 3.12 (2.73–3.57) <sup>***</sup>                                                                        | —                                                                                                  | 2.93 (2.55–3.37) <sup>***</sup>                              |
| School-level                                                      |                                                                                                        |                                                                                                    |                                                              |
| Percentage medical<br>prescription<br>opioid use, only<br>medical |                                                                                                        |                                                                                                    |                                                              |
| None                                                              | —                                                                                                      | Reference                                                                                          | Reference                                                    |
| Low (1%–11%)                                                      | —                                                                                                      | 1.49 (1.20–1.84) <sup>***</sup>                                                                    | 1.33 (1.02–1.72) <sup>*</sup>                                |
| Medium<br>(12%–19%)                                               | —                                                                                                      | 1.99 (1.61–2.47) <sup>***</sup>                                                                    | 1.65 (1.27–2.14) <sup>***</sup>                              |
| High (20%–83%)                                                    | —                                                                                                      | 1.92 (1.55–2.41) <sup>***</sup>                                                                    | 1.42 (1.09–1.84) <sup>**</sup>                               |

“Reference” refers to the reference category. Sample sizes vary because of missing data. —, variable not included in the model.

<sup>a</sup> This model controls for individual-level factors that include sex, race and ethnicity, highest parental education, grade point average, past 2 week binge drinking, past 30 d cigarette use, past 30 d marijuana use, and cohort year (results not shown).

<sup>b</sup> This model controls for school-level factors that include cohort year, private or public status of school, urbanicity of school, school size, US Census region, percentage of students with low grades, percentage male, parental education, percentage white, percentage of binge drinking, percentage of cigarette use, and percentage of marijuana use (results not shown).

<sup>c</sup> This model controls for individual-level factors that include sex, race and ethnicity, highest parental education, grade point average, past 2 week binge drinking, past 30 d cigarette use, past 30 d marijuana use, and cohort year (results not shown). Moreover, this model also controls for school-level factors that include cohort year, private or public status of school, urbanicity of school, school size, US Census region, percentage of students with low grades, percentage male, parental education, percentage white, percentage binge drinking, percentage cigarette use, and percentage marijuana use (results not shown).

\*  $P < .05$ .

\*\*  $P < .01$ .

\*\*\*  $P < .001$ .

**SUPPLEMENTAL TABLE 7** Correlates of Nonmedical POM by School-Level and Individual-Level Characteristics (2002–2017)

| Correlates                        | Past-Year Nonmedical POM, Individual-Level Only ( <i>n</i> = 28 340), Model 1, aOR (95% CI) | Past-Year Nonmedical POM, Full Model ( <i>n</i> = 28 340), Model 3, aOR (95% CI) |
|-----------------------------------|---------------------------------------------------------------------------------------------|----------------------------------------------------------------------------------|
| Individual level                  |                                                                                             |                                                                                  |
| Sex                               |                                                                                             |                                                                                  |
| Female                            | Reference                                                                                   | Reference                                                                        |
| Male                              | 0.904 (0.793–1.03)                                                                          | 0.882 (0.771–1.01)                                                               |
| Race and ethnicity                |                                                                                             |                                                                                  |
| White                             | Reference                                                                                   | Reference                                                                        |
| Multiracial                       | 0.714 (0.602, 0.847)***                                                                     | 0.762 (0.628–0.923)**                                                            |
| Highest parental education        |                                                                                             |                                                                                  |
| Less than a BA                    | Reference                                                                                   | Reference                                                                        |
| BA or higher                      | 0.877 (0.767–1.01)                                                                          | 0.876 (0.765–1.01)                                                               |
| Grade point average               |                                                                                             |                                                                                  |
| B– or higher                      | Reference                                                                                   | Reference                                                                        |
| C+ or lower                       | 1.32 (1.13–1.55)***                                                                         | 1.31 (1.12–1.55)***                                                              |
| Binge drinking                    |                                                                                             |                                                                                  |
| No                                | Reference                                                                                   | Reference                                                                        |
| Yes                               | 1.67 (1.45–1.92)***                                                                         | 1.69 (1.47–1.95)***                                                              |
| Cigarette use                     |                                                                                             |                                                                                  |
| No                                | Reference                                                                                   | Reference                                                                        |
| Yes                               | 3.07 (2.60–3.64)***                                                                         | 3.10 (2.61–3.68)***                                                              |
| Marijuana use                     |                                                                                             |                                                                                  |
| No                                | Reference                                                                                   | Reference                                                                        |
| Yes                               | 4.44 (3.82–5.16)***                                                                         | 4.42 (3.80–5.14)***                                                              |
| Medical opioid use (lifetime)     |                                                                                             |                                                                                  |
| No                                | Reference                                                                                   | Reference                                                                        |
| Yes                               | 10.0 (8.83–11.4)***                                                                         | 9.25 (8.11–10.5)***                                                              |
| Cohort year, individual or school |                                                                                             |                                                                                  |
| 2002–2005                         | Reference                                                                                   | Reference                                                                        |
| 2006–2009                         | 1.20 (0.994–1.45)                                                                           | 1.19 (0.999–1.43)                                                                |
| 2010–2013                         | 1.05 (0.865–1.28)                                                                           | 1.03 (0.845–1.27)                                                                |
| 2014–2017                         | 0.836 (0.663–1.05)                                                                          | 0.916 (0.711–1.18)                                                               |
| School level                      |                                                                                             |                                                                                  |
| Private status                    |                                                                                             |                                                                                  |
| Public school                     | —                                                                                           | Reference                                                                        |
| Private school                    | —                                                                                           | 0.898 (0.713–1.13)                                                               |
| Urbanicity of school              |                                                                                             |                                                                                  |
| Urban                             | —                                                                                           | Reference                                                                        |
| Suburban                          | —                                                                                           | 1.05 (0.898–1.24)                                                                |
| Rural                             | —                                                                                           | 0.942 (0.746–1.18)                                                               |
| School size                       |                                                                                             |                                                                                  |
| Small                             | —                                                                                           | Reference                                                                        |
| Medium                            | —                                                                                           | 0.965 (0.774–1.20)                                                               |
| High                              | —                                                                                           | 1.07 (0.855–1.33)                                                                |
| US Census region                  |                                                                                             |                                                                                  |
| Northeast                         | —                                                                                           | Reference                                                                        |
| Midwest                           | —                                                                                           | 1.12 (0.893–1.40)                                                                |
| South                             | —                                                                                           | 1.27 (1.01–1.59)*                                                                |
| West                              | —                                                                                           | 1.61 (1.27–2.04)***                                                              |
| Percentage with low grades        |                                                                                             |                                                                                  |
| Low                               | —                                                                                           | Reference                                                                        |
| Medium                            | —                                                                                           | 0.830 (0.696–0.990)*                                                             |
| High                              | —                                                                                           | 0.920 (0.751–1.12)                                                               |
| Percentage male                   |                                                                                             |                                                                                  |
| Low                               | —                                                                                           | Reference                                                                        |
| Medium                            | —                                                                                           | 1.12 (0.954–1.32)                                                                |

SUPPLEMENTAL TABLE 7 Continued

| Correlates                                       | Past-Year Nonmedical POM,<br>Individual-Level Only ( <i>n</i> = 28 340),<br>Model 1, aOR (95% CI) | Past-Year Nonmedical POM, Full<br>Model ( <i>n</i> = 28 340), Model 3, aOR<br>(95% CI) |
|--------------------------------------------------|---------------------------------------------------------------------------------------------------|----------------------------------------------------------------------------------------|
| High                                             | —                                                                                                 | 1.15 (0.978–1.37)                                                                      |
| Parental education                               |                                                                                                   |                                                                                        |
| Low                                              | —                                                                                                 | Reference                                                                              |
| Medium                                           | —                                                                                                 | 0.900 (0.743–1.09)                                                                     |
| High                                             | —                                                                                                 | 0.892 (0.706–1.12)                                                                     |
| Percentage white                                 |                                                                                                   |                                                                                        |
| Low                                              | —                                                                                                 | Reference                                                                              |
| Medium                                           | —                                                                                                 | 1.14 (0.917–1.42)                                                                      |
| High                                             | —                                                                                                 | 1.35 (1.05–1.75)*                                                                      |
| Percentage binge<br>drinking                     |                                                                                                   |                                                                                        |
| None                                             | —                                                                                                 | Reference                                                                              |
| Low                                              | —                                                                                                 | 0.581 (0.195–1.72)                                                                     |
| Medium                                           | —                                                                                                 | 0.599 (0.200–1.79)                                                                     |
| High                                             | —                                                                                                 | 0.572 (0.190–1.72)                                                                     |
| Percentage cigarette<br>use                      |                                                                                                   |                                                                                        |
| None                                             | —                                                                                                 | Reference                                                                              |
| Low                                              | —                                                                                                 | 0.564 (0.140–2.27)                                                                     |
| Medium                                           | —                                                                                                 | 0.662 (0.163–2.68)                                                                     |
| High                                             | —                                                                                                 | 0.633 (0.154–2.59)                                                                     |
| Percentage marijuana<br>use                      |                                                                                                   |                                                                                        |
| None                                             | —                                                                                                 | Reference                                                                              |
| Low                                              | —                                                                                                 | 1.87 (0.729–4.82)                                                                      |
| Medium                                           | —                                                                                                 | 2.34 (0.904–6.05)                                                                      |
| High                                             | —                                                                                                 | 1.98 (0.760–5.20)                                                                      |
| Percentage medical<br>prescription opioid<br>use |                                                                                                   |                                                                                        |
| None                                             | —                                                                                                 | Reference                                                                              |
| Low                                              | —                                                                                                 | 1.54 (0.999–2.30)                                                                      |
| Medium                                           | —                                                                                                 | 1.69 (1.12–2.54)*                                                                      |
| High                                             | —                                                                                                 | 1.70 (1.14–2.53)**                                                                     |

This table provides the individual-level variable for lifetime medical use. "Reference" refers to the reference category. Sample sizes vary because of missing data. BA, bachelor's degree; —, variable not included in the model.

\*  $P < .05$ .

\*\*  $P < .01$ .

\*\*\*  $P < .001$ .

SUPPLEMENTAL TABLE 8 School-Level Prevalence of Medical Use and Misuse of Prescription Opioids by School-Level Characteristics, 2002–2017

| School-Level Characteristics<br>(12th Grade)     | POM, Past-Year, %<br>(95% CI) | $P^a$ | Medical Use of Prescription<br>Opioids, Lifetime, %<br>(95% CI) | $P^a$ |
|--------------------------------------------------|-------------------------------|-------|-----------------------------------------------------------------|-------|
| Medical use of prescription<br>opioids, lifetime |                               | <.001 |                                                                 |       |
| None                                             | 4.8 (4.3–5.3)                 |       | —                                                               |       |
| Low                                              | 6.1 (5.8–6.4)                 |       | —                                                               |       |
| Medium                                           | 8.5 (8.1–8.9)                 |       | —                                                               |       |
| High                                             | 10.2 (9.6–10.7)               |       | —                                                               |       |
| POM, past-year                                   |                               |       |                                                                 | <.001 |
| None                                             | —                             |       | 10.3 (7.7–12.8)                                                 |       |
| Low                                              | —                             |       | 12.2 (11.2–13.2)                                                |       |
| Medium                                           | —                             |       | 17.4 (16.4–18.4)                                                |       |
| High                                             | —                             |       | 22.6 (21.6–23.6)                                                |       |

—, not applicable.

<sup>a</sup> F-test  $P$  values indicate whether rates of opioid use significantly vary by school-level characteristics.

**SUPPLEMENTAL TABLE 9** School-Level Prevalence of Medical Use and Misuse of Prescription Opioids by School-Level Characteristics, 2002–2005

| School-Level Characteristics (12th Grade)     | POM, Past-Year, % (95% CI) | <i>P</i> <sup>a</sup> | Medical Use of Prescription Opioids, Lifetime, % (95% CI) | <i>P</i> <sup>a</sup> |
|-----------------------------------------------|----------------------------|-----------------------|-----------------------------------------------------------|-----------------------|
| Medical use of prescription opioids, lifetime |                            | <.001                 |                                                           |                       |
| None                                          | 4.3 (3.3–5.4)              |                       | —                                                         |                       |
| Low                                           | 7.0 (6.1–7.8)              |                       | —                                                         |                       |
| Medium                                        | 9.8 (9.1–10.6)             |                       | —                                                         |                       |
| High                                          | 11.7 (10.4–13.1)           |                       | —                                                         |                       |
| POM, past-year                                |                            |                       |                                                           | <.001                 |
| None                                          | —                          |                       | 8.4 (3.6–13.1)                                            |                       |
| Low                                           | —                          |                       | 11.5 (9.3–13.8)                                           |                       |
| Medium                                        | —                          |                       | 17.4 (15.5–19.3)                                          |                       |
| High                                          | —                          |                       | 23.1 (21.4–24.8)                                          |                       |

—, not applicable.

<sup>a</sup> F-test *P* values indicate whether rates of opioid use significantly vary by school-level characteristics.

**SUPPLEMENTAL TABLE 10** School-Level Prevalence of Medical Use and Misuse of Prescription Opioids by School-Level Characteristics, 2006–2009

| School-Level Characteristics (12th Grade)     | POM, Past-Year, % (95% CI) | <i>P</i> <sup>a</sup> | Medical Use of Prescription Opioids, Lifetime, % (95% CI) | <i>P</i> <sup>a</sup> |
|-----------------------------------------------|----------------------------|-----------------------|-----------------------------------------------------------|-----------------------|
| Medical use of prescription opioids, lifetime |                            | <.001                 |                                                           |                       |
| None                                          | 5.8 (4.8–7.2)              |                       | —                                                         |                       |
| Low                                           | 7.5 (6.8–8.3)              |                       | —                                                         |                       |
| Medium                                        | 9.5 (8.7–10.3)             |                       | —                                                         |                       |
| High                                          | 12.4 (11.6–13.2)           |                       | —                                                         |                       |
| POM, past-year                                |                            |                       |                                                           | <.001                 |
| None                                          | —                          |                       | 5.4 (13.2–9.5)                                            |                       |
| Low                                           | —                          |                       | 10.3 (8.1–12.5)                                           |                       |
| Medium                                        | —                          |                       | 15.7 (13.7–17.7)                                          |                       |
| High                                          | —                          |                       | 23.3 (21.5–25.0)                                          |                       |

—, not applicable.

<sup>a</sup> F-test *P* values indicate whether rates of opioid use significantly vary by school-level characteristics.

**SUPPLEMENTAL TABLE 11** School-Level Prevalence of Medical Use and Misuse of Prescription Opioids by School-Level Characteristics, 2010–2013

| School-Level Characteristics (12th Grade)     | POM, Past-Year, % (95% CI) | <i>P</i> <sup>a</sup> | Medical Use of Prescription Opioids, Lifetime, % (95% CI) | <i>P</i> <sup>a</sup> |
|-----------------------------------------------|----------------------------|-----------------------|-----------------------------------------------------------|-----------------------|
| Medical use of prescription opioids, lifetime |                            | <.001                 |                                                           |                       |
| None                                          | 5.4 (4.4–6.3)              |                       | —                                                         |                       |
| Low                                           | 5.9 (5.4–6.5)              |                       | —                                                         |                       |
| Medium                                        | 8.4 (7.7–9.0)              |                       | —                                                         |                       |
| High                                          | 9.9 (8.9–10.9)             |                       | —                                                         |                       |
| POM, past-year                                |                            |                       |                                                           | <.001                 |
| None                                          | —                          |                       | 14.1 (8.3–19.8)                                           |                       |
| Low                                           | —                          |                       | 11.7 (9.9–13.5)                                           |                       |
| Medium                                        | —                          |                       | 17.9 (16.1–19.8)                                          |                       |
| High                                          | —                          |                       | 22.5 (20.4–24.5)                                          |                       |

—, not applicable.

<sup>a</sup> F-test *P* values indicate whether rates of opioid use significantly vary by school-level characteristics.

**SUPPLEMENTAL TABLE 12** School-Level Prevalence of Medical Use and Misuse of Prescription Opioids by School-Level Characteristics, 2014–2017

| School-Level Characteristics (12th Grade)     | POM, Past-Year, % (95% CI) | <i>P</i> <sup>a</sup> | Medical Use of Prescription Opioids, Lifetime, % (95% CI) | <i>P</i> <sup>a</sup> |
|-----------------------------------------------|----------------------------|-----------------------|-----------------------------------------------------------|-----------------------|
| Medical use of prescription opioids, lifetime |                            | <.001                 |                                                           |                       |
| None                                          | 4.1 (3.3–4.7)              |                       | —                                                         |                       |
| Low                                           | 4.1 (3.6–4.5)              |                       | —                                                         |                       |
| Medium                                        | 5.8 (5.2–6.2)              |                       | —                                                         |                       |
| High                                          | 5.7 (5.0–6.4)              |                       | —                                                         |                       |
| POM, past-year                                |                            |                       |                                                           | <.001                 |
| None                                          | —                          |                       | 12.1 (7.5–16.6)                                           |                       |
| Low                                           | —                          |                       | 13.6 (11.9–15.3)                                          |                       |
| Medium                                        | —                          |                       | 18.6 (16.7–20.7)                                          |                       |
| High                                          | —                          |                       | 17.1 (13.2–20.9)                                          |                       |

—, not applicable.

<sup>a</sup> F-test *P* values indicate whether rates of opioid use significantly vary by school-level characteristics.

**SUPPLEMENTAL TABLE 13** Correlates of POM by School-Level and Individual-Level Characteristics (2002–2005)

| Correlates                               | Past-Year POM, Individual-Level Correlates Only ( <i>n</i> = 48 459), Model 1, aOR (95% CI) | Past-Year POM, School-Level Correlates Only ( <i>n</i> = 56 342), Model 2, aOR (95% CI) | Past-Year POM, Full Model ( <i>n</i> = 48 459), Model 3, aOR (95% CI) |
|------------------------------------------|---------------------------------------------------------------------------------------------|-----------------------------------------------------------------------------------------|-----------------------------------------------------------------------|
| <b>Individual Level</b>                  |                                                                                             |                                                                                         |                                                                       |
| <b>Sex</b>                               |                                                                                             |                                                                                         |                                                                       |
| Female                                   | Reference                                                                                   | —                                                                                       | Reference                                                             |
| Male                                     | 1.13 (1.04–1.23)***                                                                         | —                                                                                       | 1.09 (1.00–1.19)*                                                     |
| <b>Race and ethnicity</b>                |                                                                                             |                                                                                         |                                                                       |
| White                                    | Reference                                                                                   | —                                                                                       | Reference                                                             |
| Multiracial                              | 0.546 (0.476–0.626)***                                                                      | —                                                                                       | 0.690 (0.607–0.785)***                                                |
| <b>Highest parental education</b>        |                                                                                             |                                                                                         |                                                                       |
| Less than a BA                           | Reference                                                                                   | —                                                                                       | Reference                                                             |
| BA or higher                             | 1.01 (0.931–1.11)                                                                           | —                                                                                       | 1.00 (0.921–1.10)                                                     |
| <b>Grade point average</b>               |                                                                                             |                                                                                         |                                                                       |
| B– or higher                             | Reference                                                                                   | —                                                                                       | Reference                                                             |
| C+ or lower                              | 1.19 (1.06–1.32)**                                                                          | —                                                                                       | 1.17 (1.05–1.30)***                                                   |
| <b>Binge drinking</b>                    |                                                                                             |                                                                                         |                                                                       |
| No                                       | Reference                                                                                   | —                                                                                       | Reference                                                             |
| Yes                                      | 2.03 (1.84–2.22)***                                                                         | —                                                                                       | 2.01 (1.83–2.21)***                                                   |
| <b>Cigarette use</b>                     |                                                                                             |                                                                                         |                                                                       |
| No                                       | Reference                                                                                   | —                                                                                       | Reference                                                             |
| Yes                                      | 3.63 (3.23–4.07)***                                                                         | —                                                                                       | 3.65 (3.25–4.10)***                                                   |
| <b>Marijuana use</b>                     |                                                                                             |                                                                                         |                                                                       |
| No                                       | Reference                                                                                   | —                                                                                       | Reference                                                             |
| Yes                                      | 4.90 (4.41–5.43)***                                                                         | —                                                                                       | 4.88 (4.41–5.39)***                                                   |
| <b>Cohort year, individual or school</b> |                                                                                             |                                                                                         |                                                                       |
| 2002                                     | Reference                                                                                   | Reference                                                                               | Reference                                                             |
| 2003                                     | 1.16 (0.984–1.38)                                                                           | 1.19 (1.05–1.34)**                                                                      | 1.20 (1.03, 1.39)*                                                    |
| 2004                                     | 1.25 (0.901–1.51)*                                                                          | 1.20 (1.05–1.39)**                                                                      | 1.26 (1.07–1.50)***                                                   |
| 2005                                     | 1.21 (1.01–1.46)*                                                                           | 1.15 (1.00–1.33)*                                                                       | 1.22 (1.03–1.44)*                                                     |
| <b>School level</b>                      |                                                                                             |                                                                                         |                                                                       |
| <b>Private status</b>                    |                                                                                             |                                                                                         |                                                                       |
| Public school                            | —                                                                                           | Reference                                                                               | Reference                                                             |
| Private school                           | —                                                                                           | 0.972 (0.826–1.14)                                                                      | 0.931 (0.772–1.44)                                                    |
| <b>Urbanicity of school</b>              |                                                                                             |                                                                                         |                                                                       |
| Urban                                    | —                                                                                           | Reference                                                                               | Reference                                                             |
| Suburban                                 | —                                                                                           | 1.01 (0.905–1.13)                                                                       | 0.993 (0.865–1.13)                                                    |
| Rural                                    | —                                                                                           | 1.00 (0.862–1.16)                                                                       | 1.00 (0.848–1.19)                                                     |
| <b>School size</b>                       |                                                                                             |                                                                                         |                                                                       |
| Small                                    | —                                                                                           | Reference                                                                               | Reference                                                             |
| Medium                                   | —                                                                                           | 0.965 (0.803–1.15)                                                                      | 1.00 (0.815–1.23)                                                     |
| High                                     | —                                                                                           | 0.972 (0.815–1.15)                                                                      | 1.00 (0.823–1.22)                                                     |
| <b>US Census region</b>                  |                                                                                             |                                                                                         |                                                                       |
| Northeast                                | —                                                                                           | Reference                                                                               | Reference                                                             |
| Midwest                                  | —                                                                                           | 1.02 (0.864–1.20)                                                                       | 1.02 (0.848–1.25)                                                     |
| South                                    | —                                                                                           | 1.15 (0.980–1.34)                                                                       | 1.22 (1.01–1.47)*                                                     |
| West                                     | —                                                                                           | 1.39 (1.16–1.66)***                                                                     | 1.54 (1.25–1.89)***                                                   |
| <b>Percentage with low grades</b>        |                                                                                             |                                                                                         |                                                                       |
| Low                                      | —                                                                                           | Reference                                                                               | Reference                                                             |
| Medium                                   | —                                                                                           | 1.04 (0.921–1.18)                                                                       | 1.04 (0.903–1.21)                                                     |
| High                                     | —                                                                                           | 1.20 (1.04–1.38)**                                                                      | 1.15 (0.982–1.36)                                                     |
| <b>Percentage male</b>                   |                                                                                             |                                                                                         |                                                                       |
| Low                                      | —                                                                                           | Reference                                                                               | Reference                                                             |
| Medium                                   | —                                                                                           | 1.01 (0.909–1.14)                                                                       | 0.989 (0.860–1.13)                                                    |

SUPPLEMENTAL TABLE 13 Continued

| Correlates                                                     | Past-Year POM,<br>Individual-Level Correlates<br>Only ( $n = 48\,459$ ), Model 1,<br>aOR (95% CI) | Past-Year POM,<br>School-Level Correlates<br>Only ( $n = 56\,342$ ), Model<br>2, aOR (95% CI) | Past-Year POM, Full<br>Model ( $n = 48\,459$ ),<br>Model 3, aOR (95% CI) |
|----------------------------------------------------------------|---------------------------------------------------------------------------------------------------|-----------------------------------------------------------------------------------------------|--------------------------------------------------------------------------|
| High                                                           | —                                                                                                 | 1.23 (1.08–1.40)**                                                                            | 1.23 (1.05–1.45)**                                                       |
| Parental<br>education,<br>percentage<br>with a BA or<br>higher |                                                                                                   |                                                                                               |                                                                          |
| Low                                                            | —                                                                                                 | Reference                                                                                     | Reference                                                                |
| Medium                                                         | —                                                                                                 | 0.965 (0.846–1.10)                                                                            | 0.962 (0.825–1.12)                                                       |
| High                                                           | —                                                                                                 | 1.00 (0.875–1.15)                                                                             | 0.980 (0.829–1.15)                                                       |
| Percentage white                                               |                                                                                                   |                                                                                               |                                                                          |
| Low                                                            | —                                                                                                 | Reference                                                                                     | Reference                                                                |
| Medium                                                         | —                                                                                                 | 1.61 (1.37–1.89)***                                                                           | 1.47 (1.20–1.80)***                                                      |
| High                                                           | —                                                                                                 | 1.86 (1.52–2.21)***                                                                           | 1.72 (1.38–2.13)***                                                      |
| Percentage binge<br>drinking                                   |                                                                                                   |                                                                                               |                                                                          |
| None                                                           | —                                                                                                 | Reference                                                                                     | Reference                                                                |
| Low                                                            | —                                                                                                 | 0.574 (0.387–0.852)**                                                                         | 0.437 (0.212–0.899)*                                                     |
| Medium                                                         | —                                                                                                 | 0.672 (0.455–0.994)*                                                                          | 0.431 (0.208, 0–.891)*                                                   |
| High                                                           | —                                                                                                 | 0.692 (0.465–1.03)                                                                            | 0.406 (0.195–0.846)*                                                     |
| Percentage<br>cigarette use                                    |                                                                                                   |                                                                                               |                                                                          |
| None                                                           | —                                                                                                 | Reference                                                                                     | Reference                                                                |
| Low                                                            | —                                                                                                 | 0.711 (0.175–2.89)                                                                            | 0.499 (0.102–2.43)                                                       |
| Medium                                                         | —                                                                                                 | 1.26 (0.320–4.96)                                                                             | 0.823 (0.174–3.89)                                                       |
| High                                                           | —                                                                                                 | 1.31 (0.337–5.15)                                                                             | 0.760 (0.161–3.57)                                                       |
| Percentage<br>marijuana use                                    |                                                                                                   |                                                                                               |                                                                          |
| None                                                           | —                                                                                                 | Reference                                                                                     | Reference                                                                |
| Low                                                            | —                                                                                                 | 5.13 (1.38–19.1)*                                                                             | 3.20 (0.801–12.7)                                                        |
| Medium                                                         | —                                                                                                 | 6.91 (1.87–25.5)**                                                                            | 3.60 (0.907–14.3)                                                        |
| High                                                           | —                                                                                                 | 8.49 (2.27–31.7)***                                                                           | 3.48 (0.867–13.9)                                                        |
| Percentage<br>medical use of<br>prescription<br>opioids        |                                                                                                   |                                                                                               |                                                                          |
| None                                                           | —                                                                                                 | Reference                                                                                     | Reference                                                                |
| Low                                                            | —                                                                                                 | 1.49 (1.18–1.89)***                                                                           | 1.75 (1.35–2.27)***                                                      |
| Medium                                                         | —                                                                                                 | 1.53 (1.22–1.92)***                                                                           | 1.79 (1.40–2.29)***                                                      |
| High                                                           | —                                                                                                 | 1.91 (1.52–2.41)***                                                                           | 2.13 (1.66–2.74)***                                                      |

"Reference" refers to the reference category. Sample sizes vary because of missing data. BA, bachelor's degree; —, variable not included in the model.

\*  $P < .05$ .

\*\*  $P < .01$ .

\*\*\*  $P < .001$ .

**SUPPLEMENTAL TABLE 14** Correlates of POM by School-Level and Individual-Level Characteristics (2006–2009)

| Correlates                               | Past-Year POM, Individual-Level Correlates Only ( <i>n</i> = 48 156), Model 1, aOR (95% CI) | Past-Year POM, School-Level Correlates Only ( <i>n</i> = 56 226), Model 2, aOR (95% CI) | Past-Year POM, Full Model ( <i>n</i> = 48 156), Model 3, aOR (95% CI) |
|------------------------------------------|---------------------------------------------------------------------------------------------|-----------------------------------------------------------------------------------------|-----------------------------------------------------------------------|
| <b>Individual level</b>                  |                                                                                             |                                                                                         |                                                                       |
| <b>Sex</b>                               |                                                                                             |                                                                                         |                                                                       |
| Female                                   | Reference                                                                                   | —                                                                                       | Reference                                                             |
| Male                                     | 1.14 (1.04–1.25)**                                                                          | —                                                                                       | 1.11 (1.02–1.22)*                                                     |
| <b>Race and ethnicity</b>                |                                                                                             |                                                                                         |                                                                       |
| White                                    | Reference                                                                                   | —                                                                                       | Reference                                                             |
| Multiracial                              | 0.407 (0.35–0.464)***                                                                       | —                                                                                       | 0.492 (0.432–0.561)***                                                |
| <b>Highest parental education</b>        |                                                                                             |                                                                                         |                                                                       |
| Less than a BA                           | Reference                                                                                   | —                                                                                       | Reference                                                             |
| BA or higher                             | 1.01 (0.935–1.10)                                                                           | —                                                                                       | 1.01 (0.940–1.10)                                                     |
| <b>Grade point average</b>               |                                                                                             |                                                                                         |                                                                       |
| B– or higher                             | Reference                                                                                   | —                                                                                       | Reference                                                             |
| C+ or lower                              | 1.30 (1.18–1.44)***                                                                         | —                                                                                       | 1.31 (1.19–1.44)***                                                   |
| <b>Binge drinking</b>                    |                                                                                             |                                                                                         |                                                                       |
| No                                       | Reference                                                                                   | —                                                                                       | Reference                                                             |
| Yes                                      | 2.25 (2.02–2.49)***                                                                         | —                                                                                       | 2.24 (2.02–2.49)***                                                   |
| <b>Cigarette use</b>                     |                                                                                             |                                                                                         |                                                                       |
| No                                       | Reference                                                                                   | —                                                                                       | Reference                                                             |
| Yes                                      | 3.64 (3.18–4.16)***                                                                         | —                                                                                       | 3.66 (3.20–4.18)***                                                   |
| <b>Marijuana use</b>                     |                                                                                             |                                                                                         |                                                                       |
| No                                       | Reference                                                                                   | —                                                                                       | Reference                                                             |
| Yes                                      | 4.14 (3.75–4.56)***                                                                         | —                                                                                       | 4.24 (3.85–4.67)***                                                   |
| <b>Cohort year, individual or school</b> |                                                                                             |                                                                                         |                                                                       |
| 2006                                     | Reference                                                                                   | Reference                                                                               | Reference                                                             |
| 2007                                     | 1.01 (0.886–1.15)                                                                           | 0.981 (0.886–1.08)                                                                      | 0.990 (0.877–1.11)                                                    |
| 2008                                     | 1.05 (0.917–1.21)                                                                           | 0.989 (0.886–1.10)                                                                      | 1.00 (0.878–1.14)                                                     |
| 2009                                     | 1.06 (0.891–1.26)                                                                           | 0.977 (0.867–1.10)                                                                      | 1.00 (0.865–1.17)                                                     |
| <b>School level</b>                      |                                                                                             |                                                                                         |                                                                       |
| <b>Private status</b>                    |                                                                                             |                                                                                         |                                                                       |
| Public school                            | —                                                                                           | Reference                                                                               | Reference                                                             |
| Private school                           | —                                                                                           | 1.03 (0.875–1.23)                                                                       | 0.950 (0.770–1.17)                                                    |
| <b>Urbanicity of school</b>              |                                                                                             |                                                                                         |                                                                       |
| Urban                                    | —                                                                                           | Reference                                                                               | Reference                                                             |
| Suburban                                 | —                                                                                           | 1.17 (1.06–1.29)***                                                                     | 1.28 (1.12–1.45)***                                                   |
| Rural                                    | —                                                                                           | 1.19 (1.03–1.38)*                                                                       | 1.23 (1.03, 1.47)*                                                    |
| <b>School size</b>                       |                                                                                             |                                                                                         |                                                                       |
| Small                                    | —                                                                                           | Reference                                                                               | Reference                                                             |
| Medium                                   | —                                                                                           | 0.699 (0.846–1.11)                                                                      | 0.942 (0.787–1.12)                                                    |
| High                                     | —                                                                                           | 0.346 (0.807–1.07)                                                                      | 0.931 (0.777–1.11)                                                    |
| <b>US Census region</b>                  |                                                                                             |                                                                                         |                                                                       |
| Northeast                                | —                                                                                           | Reference                                                                               | Reference                                                             |
| Midwest                                  | —                                                                                           | 1.05 (0.913–1.21)                                                                       | 1.10 (0.921–1.31)                                                     |
| South                                    | —                                                                                           | 1.03 (0.911–1.17)                                                                       | 1.13 (0.965–1.32)                                                     |
| West                                     | —                                                                                           | 1.30 (1.13–1.49)***                                                                     | 1.50 (1.25–1.80)***                                                   |
| <b>Percentage with low grades</b>        |                                                                                             |                                                                                         |                                                                       |
| Low                                      | —                                                                                           | Reference                                                                               | Reference                                                             |
| Medium                                   | —                                                                                           | 1.02 (0.908–1.15)                                                                       | 0.929 (0.798–1.08)                                                    |
| High                                     | —                                                                                           | 1.01 (0.895–1.16)                                                                       | 0.932 (0.794–1.09)                                                    |
| <b>Percentage male</b>                   |                                                                                             |                                                                                         |                                                                       |
| Low                                      | —                                                                                           | Reference                                                                               | Reference                                                             |
| Medium                                   | —                                                                                           | 1.03 (0.936–1.15)                                                                       | 1.04 (0.915–1.19)                                                     |



SUPPLEMENTAL TABLE 14 Continued

| Correlates                                                     | Past-Year POM,<br>Individual-Level Correlates<br>Only ( <i>n</i> = 48 156), Model 1,<br>aOR (95% CI) | Past-Year POM,<br>School-Level Correlates<br>Only ( <i>n</i> = 56 226), Model<br>2, aOR (95% CI) | Past-Year POM, Full<br>Model ( <i>n</i> = 48 156),<br>Model 3, aOR (95% CI) |
|----------------------------------------------------------------|------------------------------------------------------------------------------------------------------|--------------------------------------------------------------------------------------------------|-----------------------------------------------------------------------------|
| High                                                           | —                                                                                                    | 1.06 (0.953–1.19)                                                                                | 1.05 (0.961–1.22)                                                           |
| Parental<br>education,<br>percentage<br>with a BA or<br>higher |                                                                                                      |                                                                                                  |                                                                             |
| Low                                                            | —                                                                                                    | Reference                                                                                        | Reference                                                                   |
| Medium                                                         | —                                                                                                    | 1.00 (0.911–1.11)                                                                                | 0.997 (0.879–1.13)                                                          |
| High                                                           | —                                                                                                    | 1.01 (0.890–1.14)                                                                                | 0.999 (0.848–1.17)                                                          |
| Percentage white                                               |                                                                                                      |                                                                                                  |                                                                             |
| Low                                                            | —                                                                                                    | Reference                                                                                        | Reference                                                                   |
| Medium                                                         | —                                                                                                    | 1.33 (1.16–1.52)***                                                                              | 1.16 (0.977–1.37)                                                           |
| High                                                           | —                                                                                                    | 1.55 (1.33–1.81)***                                                                              | 1.29 (1.07–1.56)**                                                          |
| Percentage binge<br>drinking                                   |                                                                                                      |                                                                                                  |                                                                             |
| None                                                           | —                                                                                                    | Reference                                                                                        | Reference                                                                   |
| Low                                                            | —                                                                                                    | 1.08 (0.215–5.43)                                                                                | 0.278 (0.055–1.41)                                                          |
| Medium                                                         | —                                                                                                    | 1.45 (0.285–7.44)                                                                                | 0.323 (0.063–1.65)                                                          |
| High                                                           | —                                                                                                    | 1.69 (0.330–8.69)                                                                                | 0.316 (0.061–1.62)                                                          |
| Percentage<br>cigarette use                                    |                                                                                                      |                                                                                                  |                                                                             |
| None                                                           | —                                                                                                    | Reference                                                                                        | Reference                                                                   |
| Low                                                            | —                                                                                                    | 0.410 (0.313–0.537)***                                                                           | 0.264 (0.190–0.368)***                                                      |
| Medium                                                         | —                                                                                                    | 0.615 (0.454–0.833)**                                                                            | 0.330 (0.226–0.480)***                                                      |
| High                                                           | —                                                                                                    | 0.632 (0.455–0.878)**                                                                            | 0.294 (0.195–0.445)***                                                      |
| Percentage<br>marijuana use                                    |                                                                                                      |                                                                                                  |                                                                             |
| None                                                           | —                                                                                                    | Reference                                                                                        | Reference                                                                   |
| Low                                                            | —                                                                                                    | 4.19 (1.91–9.22)***                                                                              | 7.50 (2.12–26.5)**                                                          |
| Medium                                                         | —                                                                                                    | 5.19 (1.87–11.4)***                                                                              | 7.33 (2.06–26.0)**                                                          |
| High                                                           | —                                                                                                    | 6.31 (2.84–13.9)***                                                                              | 7.39 (2.07–26.4)**                                                          |
| Percentage<br>medical use of<br>prescription<br>opioids        |                                                                                                      |                                                                                                  |                                                                             |
| None                                                           | —                                                                                                    | Reference                                                                                        | Reference                                                                   |
| Low                                                            | —                                                                                                    | 1.27 (1.02–1.58)*                                                                                | 1.33 (1.35–2.27)*                                                           |
| Medium                                                         | —                                                                                                    | 1.46 (1.17–1.84)***                                                                              | 1.56 (1.40–2.29)***                                                         |
| High                                                           | —                                                                                                    | 1.63 (1.30–2.04)***                                                                              | 1.81 (1.43–2.74)***                                                         |

"Reference" refers to the reference category. Sample sizes vary because of missing data. BA, bachelor's degree; —, variable not included in the model.

\*  $P < .05$ .

\*\*  $P < .01$ .

\*\*\*  $P < .001$ .

**SUPPLEMENTAL TABLE 15** Correlates of POM by School-Level and Individual-Level Characteristics (2010–2013)

| Correlates                               | Past-Year POM, Individual-Level Correlates Only ( <i>n</i> = 46 363) Model 1, aOR (95% CI) | Past-Year POM, School-Level Correlates Only ( <i>n</i> = 54 607), Model 2, aOR (95% CI) | Past-Year POM, Full Model ( <i>n</i> = 46 363), Model 3, aOR (95% CI) |
|------------------------------------------|--------------------------------------------------------------------------------------------|-----------------------------------------------------------------------------------------|-----------------------------------------------------------------------|
| <b>Individual level</b>                  |                                                                                            |                                                                                         |                                                                       |
| <b>Sex</b>                               |                                                                                            |                                                                                         |                                                                       |
| Female                                   | Reference                                                                                  | —                                                                                       | Reference                                                             |
| Male                                     | 1.05 (0.966–1.15)                                                                          | —                                                                                       | 1.04 (0.957–1.14)                                                     |
| <b>Race and ethnicity</b>                |                                                                                            |                                                                                         |                                                                       |
| White                                    | Reference                                                                                  | —                                                                                       | Reference                                                             |
| Multiracial                              | 0.569 (0.505–0.642)***                                                                     | —                                                                                       | 0.611 (0.539–0.693)***                                                |
| <b>Highest parental education</b>        |                                                                                            |                                                                                         |                                                                       |
| Less than a BA                           | Reference                                                                                  | —                                                                                       | Reference                                                             |
| BA or higher                             | 0.932 (0.844–1.02)                                                                         | —                                                                                       | 0.944 (0.865–1.04)                                                    |
| <b>Grade point average</b>               |                                                                                            |                                                                                         |                                                                       |
| B– or higher                             | Reference                                                                                  | —                                                                                       | Reference                                                             |
| C+ or lower                              | 1.24 (1.11–1.38)***                                                                        | —                                                                                       | 1.22 (1.10–1.36)***                                                   |
| <b>Binge drinking</b>                    |                                                                                            |                                                                                         |                                                                       |
| No                                       | Reference                                                                                  | —                                                                                       | Reference                                                             |
| Yes                                      | 1.99 (1.79–2.20)***                                                                        | —                                                                                       | 2.08 (1.89–2.28)***                                                   |
| <b>Cigarette use</b>                     |                                                                                            |                                                                                         |                                                                       |
| No                                       | Reference                                                                                  | —                                                                                       | Reference                                                             |
| Yes                                      | 3.40 (3.05–3.79)***                                                                        | —                                                                                       | 3.34 (3.01–3.70)***                                                   |
| <b>Marijuana use</b>                     |                                                                                            |                                                                                         |                                                                       |
| No                                       | Reference                                                                                  | —                                                                                       | Reference                                                             |
| Yes                                      | 4.23 (3.82–4.69)***                                                                        | —                                                                                       | 4.22 (3.80–4.69)***                                                   |
| <b>Cohort year, individual or school</b> |                                                                                            |                                                                                         |                                                                       |
| 2010                                     | Reference                                                                                  | Reference                                                                               | Reference                                                             |
| 2011                                     | 1.01 (0.885–1.16)                                                                          | 0.959 (0.856–1.07)                                                                      | 0.966 (0.851–1.09)                                                    |
| 2012                                     | 0.842 (0.702–1.01)                                                                         | 0.863 (0.760–0.981)*                                                                    | 0.809 (0.693–0.945)                                                   |
| 2013                                     | 0.792 (0.673–0.932)**                                                                      | 0.754 (0.663–0.857)***                                                                  | 0.739 (0.636–0.860)                                                   |
| <b>School level</b>                      |                                                                                            |                                                                                         |                                                                       |
| <b>Private status</b>                    |                                                                                            |                                                                                         |                                                                       |
| Public school                            | —                                                                                          | Reference                                                                               | Reference                                                             |
| Private school                           | —                                                                                          | 0.837 (0.681–1.02)                                                                      | 0.820 (0.646–1.04)                                                    |
| <b>Urbanicity of school</b>              |                                                                                            |                                                                                         |                                                                       |
| Urban                                    | —                                                                                          | Reference                                                                               | Reference                                                             |
| Suburban                                 | —                                                                                          | 0.970 (0.868–1.08)                                                                      | 0.990 (0.857–1.14)                                                    |
| Rural                                    | —                                                                                          | 0.975 (0.849–1.11)                                                                      | 1.03 (0.872–1.22)                                                     |
| <b>School size</b>                       |                                                                                            |                                                                                         |                                                                       |
| Small                                    | —                                                                                          | Reference                                                                               | Reference                                                             |
| Medium                                   | —                                                                                          | 1.00 (0.874–1.15)                                                                       | 0.999 (0.836–1.19)                                                    |
| High                                     | —                                                                                          | 0.903 (0.776–1.05)                                                                      | 0.937 (0.778–1.12)                                                    |
| <b>US Census region</b>                  |                                                                                            |                                                                                         |                                                                       |
| Northeast                                | —                                                                                          | Reference                                                                               | Reference                                                             |
| Midwest                                  | —                                                                                          | 1.16 (1.01–1.33)                                                                        | 1.15 (0.967–1.37)                                                     |
| South                                    | —                                                                                          | 1.12 (0.987–1.28)                                                                       | 1.17 (0.994–1.38)                                                     |
| West                                     | —                                                                                          | 1.31 (1.13–1.53)***                                                                     | 1.41 (1.17–1.71)***                                                   |
| <b>Percentage with low grades</b>        |                                                                                            |                                                                                         |                                                                       |
| Low                                      | —                                                                                          | Reference                                                                               | Reference                                                             |
| Medium                                   | —                                                                                          | 1.09 (0.978–1.21)                                                                       | 1.12 (0.985–1.29)                                                     |
| High                                     | —                                                                                          | 1.00 (0.879–1.14)                                                                       | 0.994 (0.838–1.17)                                                    |
| <b>Percentage male</b>                   |                                                                                            |                                                                                         |                                                                       |
| Low                                      | —                                                                                          | Reference                                                                               | Reference                                                             |
| Medium                                   | —                                                                                          | 1.11 (0.999–1.25)                                                                       | 1.09 (0.958–1.24)                                                     |

SUPPLEMENTAL TABLE 15 Continued

| Correlates                                              | Past-Year POM,<br>Individual-Level Correlates<br>Only ( <i>n</i> = 46 363) Model 1,<br>aOR (95% CI) | Past-Year POM,<br>School-Level Correlates<br>Only ( <i>n</i> = 54 607), Model<br>2, aOR (95% CI) | Past-Year POM, Full<br>Model ( <i>n</i> = 46 363),<br>Model 3, aOR (95% CI) |
|---------------------------------------------------------|-----------------------------------------------------------------------------------------------------|--------------------------------------------------------------------------------------------------|-----------------------------------------------------------------------------|
| High Parental education, percentage with a BA or higher | —                                                                                                   | 1.09 (0.969–1.22)                                                                                | 1.04 (0.910–1.20)                                                           |
| Low                                                     | —                                                                                                   | Reference                                                                                        | Reference                                                                   |
| Medium                                                  | —                                                                                                   | 0.975 (0.854–1.11)                                                                               | 0.992 (0.846–1.16)                                                          |
| High                                                    | —                                                                                                   | 0.923 (0.788–1.08)                                                                               | 1.00 (0.822–1.23)                                                           |
| Percentage white                                        |                                                                                                     |                                                                                                  |                                                                             |
| Low                                                     | —                                                                                                   | Reference                                                                                        | Reference                                                                   |
| Medium                                                  | —                                                                                                   | 1.45 (1.25–1.67)***                                                                              | 1.16 (0.974–1.40)                                                           |
| High                                                    | —                                                                                                   | 1.45 (1.25–1.68)***                                                                              | 1.14 (0.950–1.38)                                                           |
| Percentage binge drinking                               |                                                                                                     |                                                                                                  |                                                                             |
| None                                                    | —                                                                                                   | Reference                                                                                        | Reference                                                                   |
| Low                                                     | —                                                                                                   | 0.698 (0.339–1.43)                                                                               | 0.426 (0.185–0.981)                                                         |
| Medium                                                  | —                                                                                                   | 0.710 (0.344–1.46)                                                                               | 0.381 (0.165–0.882)*                                                        |
| High                                                    | —                                                                                                   | 0.726 (0.352–1.49)                                                                               | 0.311 (0.134–0.718)**                                                       |
| Percentage cigarette use                                |                                                                                                     |                                                                                                  |                                                                             |
| None                                                    | —                                                                                                   | Reference                                                                                        | Reference                                                                   |
| Low                                                     | —                                                                                                   | 2.64 (1.16–6.04)*                                                                                | 2.38 (0.952–5.95)                                                           |
| Medium                                                  | —                                                                                                   | 3.05 (1.33–7.00)**                                                                               | 2.36 (0.939–5.92)                                                           |
| High                                                    | —                                                                                                   | 3.74 (1.62–8.62)**                                                                               | 2.75 (1.08–6.97)*                                                           |
| Percentage marijuana use                                |                                                                                                     |                                                                                                  |                                                                             |
| None                                                    | —                                                                                                   | Reference                                                                                        | Reference                                                                   |
| Low                                                     | —                                                                                                   | 2.12 (1.09–4.12)*                                                                                | 1.37 (0.690–2.72)                                                           |
| Medium                                                  | —                                                                                                   | 2.98 (1.52–5.85)***                                                                              | 1.56 (0.772–3.15)                                                           |
| High                                                    | —                                                                                                   | 3.44 (1.75–6.75)***                                                                              | 1.60 (0.790–3.24)                                                           |
| Percentage medical use of prescription opioids          |                                                                                                     |                                                                                                  |                                                                             |
| None                                                    | —                                                                                                   | Reference                                                                                        | Reference                                                                   |
| Low                                                     | —                                                                                                   | 0.982 (0.803–1.20)                                                                               | 0.833 (0.681–1.14)                                                          |
| Medium                                                  | —                                                                                                   | 1.23 (1.01–1.50)*                                                                                | 1.16 (0.899–1.51)                                                           |
| High                                                    | —                                                                                                   | 1.52 (1.24–1.85)***                                                                              | 1.41 (1.08–1.83)**                                                          |

"Reference" refers to the reference category. Sample sizes vary because of missing data. BA, bachelor's degree; —, variable not included in the model.

\*  $P < .05$ .

\*\*  $P < .01$ .

\*\*\*  $P < .001$ .

**SUPPLEMENTAL TABLE 16** Correlates of POM by School-Level and Individual-Level Characteristics (2014–2017)

| Correlates                               | Past-Year POM, Individual-Level Correlates Only ( <i>n</i> = 40 624), Model 1, aOR (95% CI) | Past-Year POM, School-Level Correlates Only ( <i>n</i> = 49 582, Model 2), aOR (95% CI) | Past-Year POM, Full Model <i>n</i> = 40 624, (Model 3), aOR (95% CI) |
|------------------------------------------|---------------------------------------------------------------------------------------------|-----------------------------------------------------------------------------------------|----------------------------------------------------------------------|
| <b>Individual level</b>                  |                                                                                             |                                                                                         |                                                                      |
| <b>Sex</b>                               |                                                                                             |                                                                                         |                                                                      |
| Female                                   | Reference                                                                                   | —                                                                                       | Reference                                                            |
| Male                                     | 1.22 (1.07–1.39)**                                                                          | —                                                                                       | 1.21 (1.06–1.38)**                                                   |
| <b>Race and ethnicity</b>                |                                                                                             |                                                                                         |                                                                      |
| White                                    | Reference                                                                                   | —                                                                                       | Reference                                                            |
| Multiracial                              | 0.863 (734, 1.01)                                                                           | —                                                                                       | 0.815 (0.692–0.691)*                                                 |
| <b>Highest parental education</b>        |                                                                                             |                                                                                         |                                                                      |
| Less than a BA                           | Reference                                                                                   | —                                                                                       | Reference                                                            |
| BA or higher                             | 1.06 (0.944–1.20)                                                                           | —                                                                                       | 1.01 (0.899–1.14)                                                    |
| <b>Grade point average</b>               |                                                                                             |                                                                                         |                                                                      |
| B– or higher                             | Reference                                                                                   | —                                                                                       | Reference                                                            |
| C+ or lower                              | 1.19 (1.02–1.40)*                                                                           | —                                                                                       | 1.21 (1.04–1.41)*                                                    |
| <b>Binge drinking</b>                    |                                                                                             |                                                                                         |                                                                      |
| No                                       | Reference                                                                                   | —                                                                                       | Reference                                                            |
| Yes                                      | 1.88 (1.67–2.10)***                                                                         | —                                                                                       | 2.00 (1.78–2.24)***                                                  |
| <b>Cigarette use</b>                     |                                                                                             |                                                                                         |                                                                      |
| No                                       | Reference                                                                                   | —                                                                                       | Reference                                                            |
| Yes                                      | 3.62 (3.08–4.25)***                                                                         | —                                                                                       | 3.52 (3.00–4.12)***                                                  |
| <b>Marijuana use</b>                     |                                                                                             |                                                                                         |                                                                      |
| No                                       | Reference                                                                                   | —                                                                                       | Reference                                                            |
| Yes                                      | 4.29 (3.69–4.99)***                                                                         | —                                                                                       | 4.44 (3.80–5.20)***                                                  |
| <b>Cohort year, individual or school</b> |                                                                                             |                                                                                         |                                                                      |
| 2014                                     | Reference                                                                                   | Reference                                                                               | Reference                                                            |
| 2015                                     | 0.952 (0.808–1.12)                                                                          | 0.959 (0.835–1.10)                                                                      | 0.916 (0.778–1.07)                                                   |
| 2016                                     | 0.869 (0.700–1.07)                                                                          | 0.816 (0.696–0.956)*                                                                    | 0.821 (0.688–0.979)*                                                 |
| 2017                                     | 0.783 (0.635–0.965)*                                                                        | 0.727 (0.623–0.849)***                                                                  | 0.770 (0.645–0.920)**                                                |
| <b>School level</b>                      |                                                                                             |                                                                                         |                                                                      |
| <b>Private status</b>                    |                                                                                             |                                                                                         |                                                                      |
| Public school                            | —                                                                                           | Reference                                                                               | Reference                                                            |
| Private school                           | —                                                                                           | 1.01 (0.839–1.22)                                                                       | 1.08 (0.869–1.35)                                                    |
| <b>Urbanicity of school</b>              |                                                                                             |                                                                                         |                                                                      |
| Urban                                    | —                                                                                           | Reference                                                                               | Reference                                                            |
| Suburban                                 | —                                                                                           | 1.30 (1.12–1.50)***                                                                     | 1.32 (1.13–1.55)                                                     |
| Rural                                    | —                                                                                           | 1.08 (0.884–1.31)                                                                       | 1.04 (0.822–1.31)                                                    |
| <b>School size</b>                       |                                                                                             |                                                                                         |                                                                      |
| Small                                    | —                                                                                           | Reference                                                                               | Reference                                                            |
| Medium                                   | —                                                                                           | 0.894 (0.756–1.05)                                                                      | 0.915 (0.751–1.11)                                                   |
| High                                     | —                                                                                           | 0.823 (0.693,0.978)*                                                                    | 0.834 (0.679–1.02)                                                   |
| <b>US Census region</b>                  |                                                                                             |                                                                                         |                                                                      |
| Northeast                                | —                                                                                           | Reference                                                                               | Reference                                                            |
| Midwest                                  | —                                                                                           | 1.64 (1.38–1.96)***                                                                     | 1.56 (1.27–1.92)***                                                  |
| South                                    | —                                                                                           | 1.90 (1.59–2.25)***                                                                     | 1.88 (1.53–2.31)***                                                  |
| West                                     | —                                                                                           | 1.88 (1.54–2.28)***                                                                     | 1.77 (1.43–2.18)***                                                  |
| <b>Percentage with low grades</b>        |                                                                                             |                                                                                         |                                                                      |
| Low                                      | —                                                                                           | Reference                                                                               | Reference                                                            |
| Medium                                   | —                                                                                           | 1.03 (0.901–1.19)                                                                       | 1.07 (0.910–1.26)                                                    |
| High                                     | —                                                                                           | 1.02 (0.854–1.22)                                                                       | 0.999 (0.805–1.23)                                                   |
| <b>Percentage male</b>                   |                                                                                             |                                                                                         |                                                                      |
| Low                                      | —                                                                                           | Reference                                                                               | Reference                                                            |
| Medium                                   | —                                                                                           | 1.02 (0.890–1.18)                                                                       | 1.00 (0.847–1.19)                                                    |

SUPPLEMENTAL TABLE 16 Continued

| Correlates                                                     | Past-Year POM,<br>Individual-Level Correlates<br>Only ( $n = 40\,624$ ), Model 1,<br>aOR (95% CI) | Past-Year POM,<br>School-Level Correlates<br>Only ( $n = 49\,582$ , Model<br>2), aOR (95% CI) | Past-Year POM, Full<br>Model ( $n = 40\,624$ ,<br>Model 3), aOR (95%<br>CI) |
|----------------------------------------------------------------|---------------------------------------------------------------------------------------------------|-----------------------------------------------------------------------------------------------|-----------------------------------------------------------------------------|
| High                                                           | —                                                                                                 | 1.01 (0.873–1.17)                                                                             | 0.965 (0.811–1.14)                                                          |
| Parental<br>education,<br>percentage<br>with a BA or<br>higher |                                                                                                   |                                                                                               |                                                                             |
| Low                                                            | —                                                                                                 | Reference                                                                                     | Reference                                                                   |
| Medium                                                         | —                                                                                                 | 1.25 (1.04–1.49)*                                                                             | 1.24 (1.00–1.53)*                                                           |
| High                                                           | —                                                                                                 | 1.40 (1.13–1.72)**                                                                            | 1.35 (1.03–1.75)*                                                           |
| Percentage white                                               |                                                                                                   |                                                                                               |                                                                             |
| Low                                                            | —                                                                                                 | Reference                                                                                     | Reference                                                                   |
| Medium                                                         | —                                                                                                 | 1.02 (0.892–1.18)                                                                             | 0.875 (0.731–1.04)                                                          |
| High                                                           | —                                                                                                 | 1.06 (0.866–1.30)                                                                             | 0.835 (0.656–1.06)                                                          |
| Percentage binge<br>drinking                                   |                                                                                                   |                                                                                               |                                                                             |
| None                                                           | —                                                                                                 | Reference                                                                                     | Reference                                                                   |
| Low                                                            | —                                                                                                 | 1.69 (0.704–4.07)                                                                             | 1.67 (0.607–4.63)                                                           |
| Medium                                                         | —                                                                                                 | 1.83 (0.759–4.44)                                                                             | 1.53 (0.547–4.27)                                                           |
| High                                                           | —                                                                                                 | 1.73 (0.711–4.23)                                                                             | 1.29 (0.456–3.66)                                                           |
| Percentage<br>cigarette use                                    |                                                                                                   |                                                                                               |                                                                             |
| None                                                           | —                                                                                                 | Reference                                                                                     | Reference                                                                   |
| Low                                                            | —                                                                                                 | 1.01 (0.532–1.92)                                                                             | 0.527 (0.307–0.905)*                                                        |
| Medium                                                         | —                                                                                                 | 1.22 (0.631–2.38)                                                                             | 0.499 (0.284–0.875)*                                                        |
| High                                                           | —                                                                                                 | 1.42 (0.710–2.86)                                                                             | 0.534 (0.286–0.998)*                                                        |
| Percentage<br>marijuana use                                    |                                                                                                   |                                                                                               |                                                                             |
| None                                                           | —                                                                                                 | Reference                                                                                     | Reference                                                                   |
| Low                                                            | —                                                                                                 | 1.55 (1.18–2.03)**                                                                            | 0.818 (0.610–1.09)                                                          |
| Medium                                                         | —                                                                                                 | 2.29 (1.72–3.06)***                                                                           | 0.979 (0.705–1.35)                                                          |
| High                                                           | —                                                                                                 | 2.60 (1.95–3.45)***                                                                           | 0.907 (0.653–1.26)                                                          |
| Percentage<br>medical use of<br>prescription<br>opioids        |                                                                                                   |                                                                                               |                                                                             |
| None                                                           | —                                                                                                 | Reference                                                                                     | Reference                                                                   |
| Low                                                            | —                                                                                                 | 0.885 (0.701–1.11)                                                                            | 0.860 (0.659–1.12)                                                          |
| Medium                                                         | —                                                                                                 | 1.13 (0.891–1.44)                                                                             | 1.05 (0.797–1.39)                                                           |
| High                                                           | —                                                                                                 | 1.01 (0.784–1.32)                                                                             | 1.06 (0.792–1.43)                                                           |

"Reference" refers to the reference category. Sample sizes vary because of missing data. BA, bachelor's degree; —, variable not included in the model.

\*  $P < .05$ .

\*\*  $P < .01$ .

\*\*\*  $P < .001$ .

**SUPPLEMENTAL TABLE 17** POM by Individual- and School-Level Characteristics (2002–2017):  
Interaction Effect Model (Cohort Year × Different Levels of Medical Prescription Opioid Use)

|                                                          | Past-Year POM, Full Model ( <i>n</i> = 183 479), Model 1, <sup>a</sup> aOR (95% CI) | Past-Year POM, Interaction Effect Model ( <i>n</i> = 183 479), Model 2, <sup>a</sup> aOR (95% CI) |
|----------------------------------------------------------|-------------------------------------------------------------------------------------|---------------------------------------------------------------------------------------------------|
| <b>Main effects</b>                                      |                                                                                     |                                                                                                   |
| Cohort year, individual or school                        |                                                                                     |                                                                                                   |
| 2002–2005                                                | Reference                                                                           | Reference                                                                                         |
| 2006–2009                                                | 1.14 (1.05–1.25)**                                                                  | 1.34 (0.995–1.80)                                                                                 |
| 2010–2013                                                | 0.962 (0.872–1.06)                                                                  | 1.68 (1.22–2.31)***                                                                               |
| 2014–2017                                                | 0.743 (0.654–0.845)***                                                              | 1.36 (0.934–1.98)                                                                                 |
| Percentage medical prescription opioid use, school-level |                                                                                     |                                                                                                   |
| None                                                     | Reference                                                                           | Reference                                                                                         |
| Low                                                      | 1.12 (0.969–1.31)                                                                   | 1.71 (1.29–2.25)***                                                                               |
| Medium                                                   | 1.37 (1.17–1.60)***                                                                 | 1.93 (1.51–2.48)***                                                                               |
| High                                                     | 1.57 (1.35–1.83)***                                                                 | 2.23 (1.73–2.87)***                                                                               |
| <b>Interaction effects</b>                               |                                                                                     |                                                                                                   |
| 2006–2009 × low medical prescription opioid use          | —                                                                                   | 0.796 (0.562–1.12)                                                                                |
| 2006–2009 × medium medical prescription opioid use       | —                                                                                   | 0.834 (0.559–1.16)                                                                                |
| 2006–2009 × high medical prescription opioid use         | —                                                                                   | 0.886 (0.639–1.22)                                                                                |
| 2010–2013 × low medical prescription opioid use          | —                                                                                   | 0.502 (0.346–0.728)***                                                                            |
| 2010–2013 × medium medical prescription opioid use       | —                                                                                   | 0.554 (0.391–0.784)***                                                                            |
| 2010–2013 × high medical prescription opioid use         | —                                                                                   | 0.596 (0.402–0.806)**                                                                             |
| 2014–2017 × low medical prescription opioid use          | —                                                                                   | 0.487 (0.322–0.735)***                                                                            |
| 2014–2017 × medium medical prescription opioid use       | —                                                                                   | 0.571 (0.385–0.845)**                                                                             |
| 2014–2017 × high medical prescription opioid use         | —                                                                                   | 0.449 (0.297–0.678)***                                                                            |

“Reference” refers to the reference category. Sample sizes vary because of missing data. —, variable not included in the model.

<sup>a</sup> These models control for individual-level factors that include sex, race and ethnicity, highest parental education, grade point average, past 2 week binge drinking, past 30 d cigarette use, past 30 d marijuana use, and cohort year (results not shown). Moreover, this model also controls for school-level factors that include cohort year, private or public status of school, urbanicity of school, school size, US Census region, percentage of students with low grades, percentage male, parental education, percentage white, percentage binge drinking, percentage cigarette use, and percentage marijuana use (results not shown).

\*\* *p* < .01.

\*\*\* *p* < .001.
